# Supplementary material for: Magnesium β-ketoiminates as CVD precursors for MgO formation
Source: Royal Society of Chemistry journal article supplement (doi:10.1039/c8ra01851k), 2018-01-01
Supplement: c8ra01851k1.pdf [file c8ra01851k1.pdf]

## Electronic Supplementary Information

# Magnesium $\beta$ -Ketoiminates as CVD Precursors for MgO Formation

Elaheh Pousaneh<sup>[a]</sup>, Tobias Ruffer<sup>[a]</sup>, Khaybar Assim<sup>[a]</sup>, Volodymyr Dzhagan<sup>[b,c]</sup>, Julian Noll<sup>[a]</sup>, Dietrich R. T. Zahn<sup>[b]</sup>, Lutz Mertens<sup>[d]</sup>, Michael Mehring<sup>[d]</sup>, Stefan E. Schulz<sup>[e,f]</sup>, Heinrich Lang<sup>\*[a]</sup>

a) *Technische Universität Chemnitz, Faculty of Natural Sciences, Institute of Chemistry, Inorganic Chemistry, D-09107 Chemnitz, Germany*

b) *Technische Universität Chemnitz, Faculty of Natural Sciences, Institute of Physics, Semiconductor Physics, D-09107 Chemnitz, Germany*

c) *V. E. Lashkaryov Institute of Semiconductors Physics, National Academy of Sciences of Ukraine, 03028 Kyiv, Ukraine*

d) *Technische Universität Chemnitz, Faculty of Natural Sciences, Institute of Chemistry, Coordination Chemistry, D-09107 Chemnitz, Germany*

e) *Technische Universität Chemnitz, Center for Microtechnologies, D-09107 Chemnitz, Germany*

f) *Fraunhofer Institute for Electronic Nano Systems ENAS, Technologie-Campus 3, D-09126 Chemnitz, Germany*

\* *Corresponding author: Email: heinrich.lang@chemie.tu-chemnitz.de; Phone: +49 (0)371-531-21210; Fax: +49-(0)371-531-21219*

## Content

|                                                                                |     |
|--------------------------------------------------------------------------------|-----|
| DSC traces of <b>3a–c</b> under argon.....                                     | 3,4 |
| PXRD pattern of the TG residues of <b>3b</b> and <b>3c</b> .....               | 4,5 |
| SEM images of the deposited layers obtained from <b>3a</b> and <b>3c</b> ..... | 5,6 |
| EDX spectra of the deposited films obtained from <b>3a</b> and <b>3c</b> ..... | 7,8 |
| XPS spectra of the deposits obtained from <b>3a</b> and <b>3c</b> .....        | 8,9 |
| Detailed XPS spectra obtained from <b>3a</b> .....                             | 10  |
| PXRD pattern of the layer <b>3c</b> .....                                      | 10  |

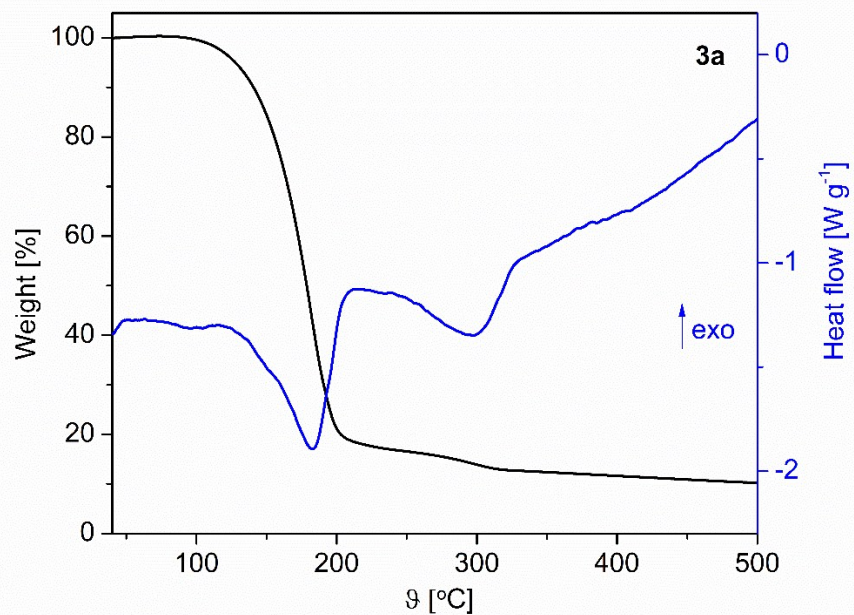

**Figure S1.** DSC traces of **3a** under argon (gas flow  $20 \text{ mL min}^{-1}$ , argon carrier gas flow  $20 \text{ mL min}^{-1}$ , heating rate  $10 \text{ }^\circ\text{C min}^{-1}$ ).

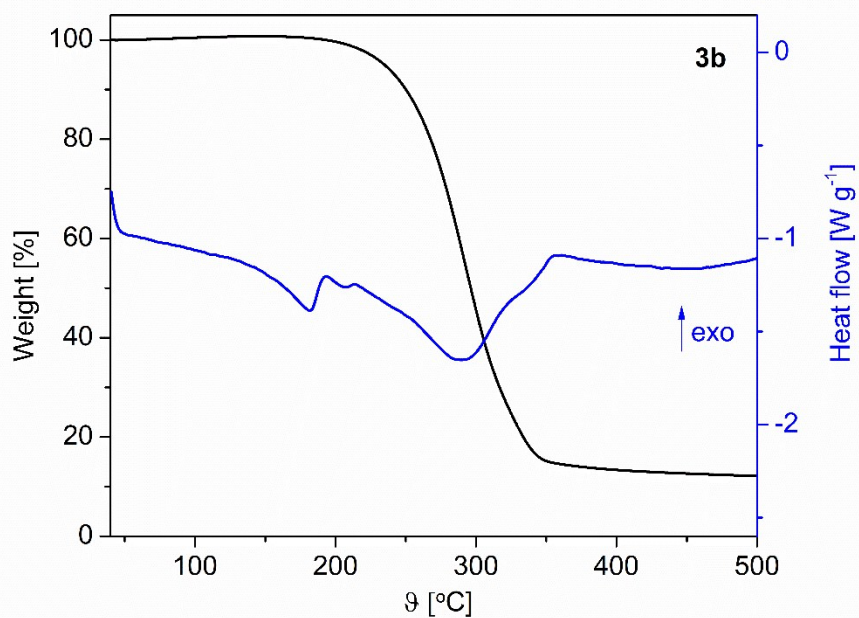

**Figure S2.** DSC traces of **3b** under argon (gas flow  $20 \text{ mL min}^{-1}$ , argon carrier gas flow  $20 \text{ mL min}^{-1}$ , heating rate  $10 \text{ }^\circ\text{C min}^{-1}$ ).

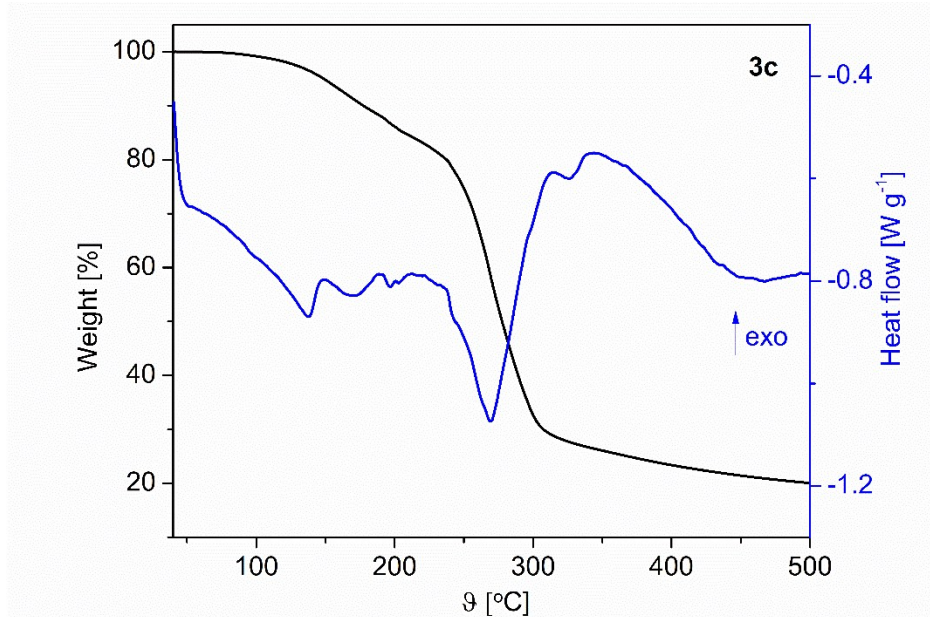

**Figure S3.** DSC traces of **3c** under argon (gas flow 20 mL min<sup>-1</sup>, argon carrier gas flow 20 mL min<sup>-1</sup>, heating rate 10 °C min<sup>-1</sup>).

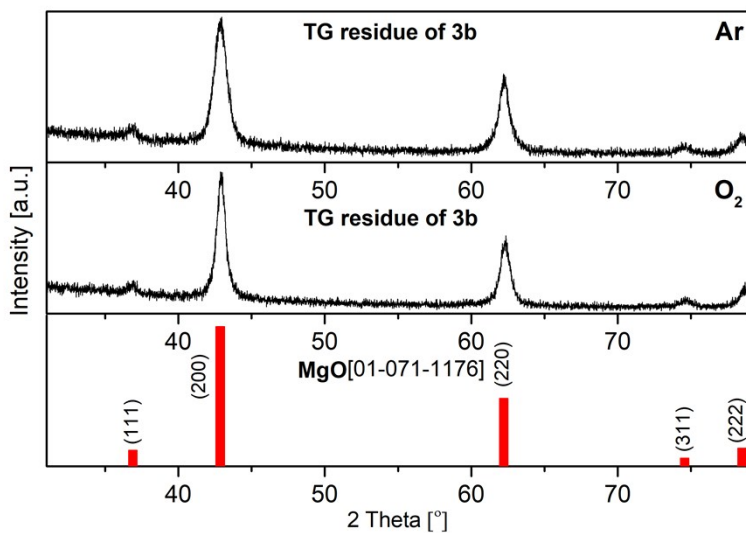

**Figure S4.** PXRD pattern of the TG residues of **3b** under argon (top) vs under oxygen (middle) (red: crystalline MgO (ICDD 01-071-1176). (Crystal size: top: 10 ± 1 nm, middle: 14 ± 1 nm.)

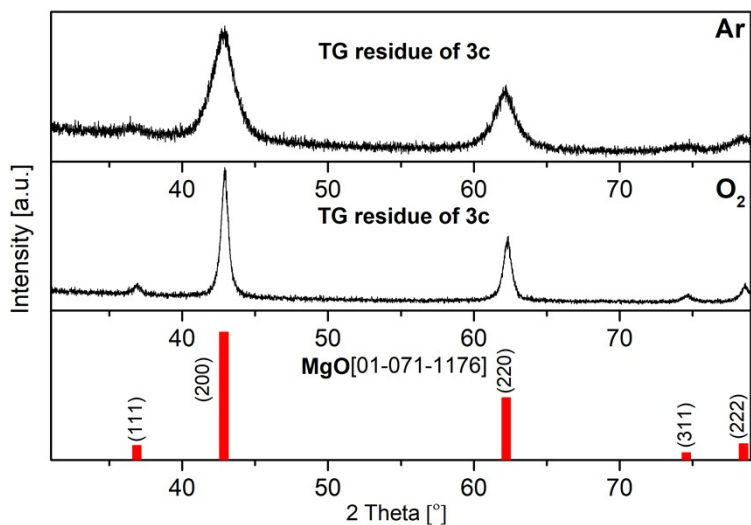

**Figure S5.** PXR D pattern of the TG residues of **3c** under Ar (top) vs under oxygen (middle) (red: crystalline MgO (ICDD 01-071-1176)). (Crystal size: top:  $8 \pm 1$  nm, middle:  $17 \pm 1$  nm.)

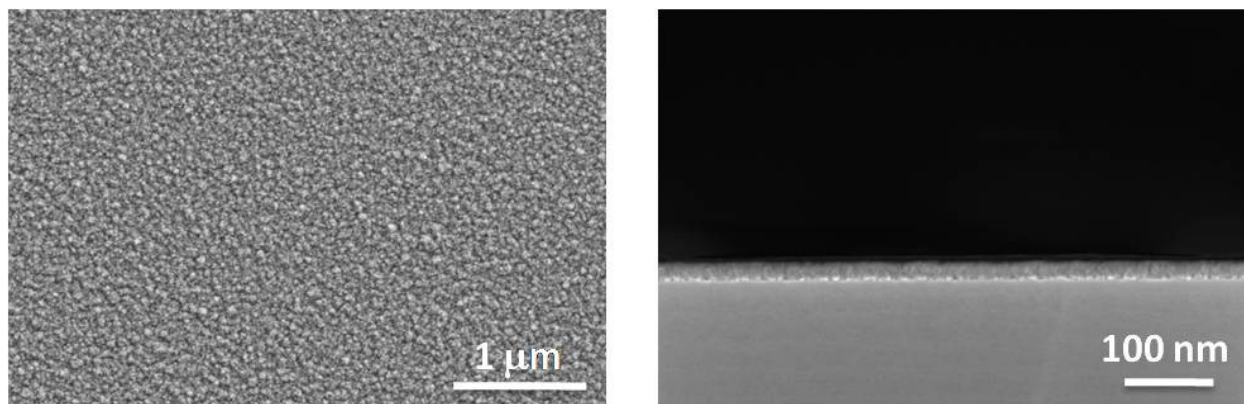

**Figure S6.** Left: Layer obtained from the CVD of **3a**. Right: Cross section image obtained from the CVD of **3a**, substrate temperature 450 °C, deposition time 1 h, working pressure 1 mbar, N<sub>2</sub> (50 mL min<sup>-1</sup>), O<sub>2</sub> (40 mL min<sup>-1</sup>).

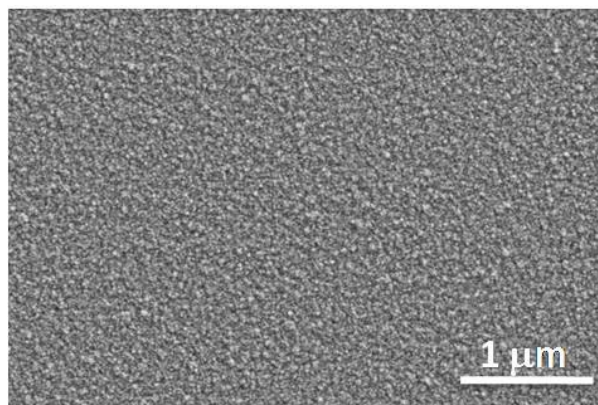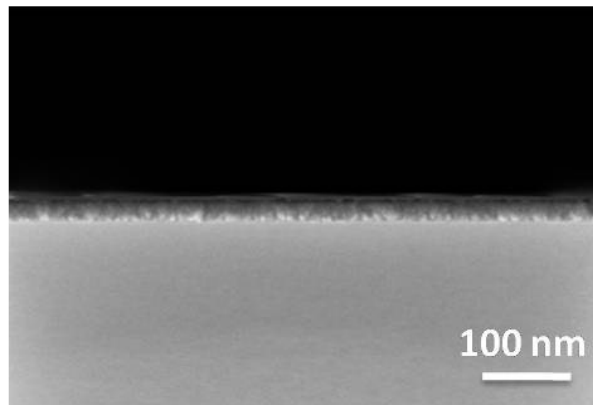

**Figure S7.** Left: Layer obtained from the CVD of **3c**. Right: Cross section image obtained from the CVD of **3c**, substrate temperature 450 °C, deposition time 1 h, working pressure 1 mbar, N<sub>2</sub> (50 mL min<sup>-1</sup>), O<sub>2</sub> (40 mL min<sup>-1</sup>).

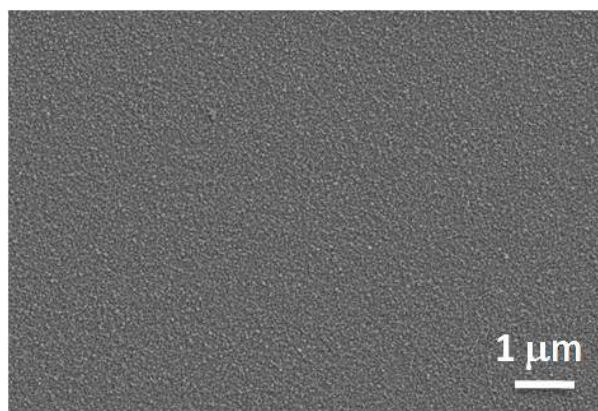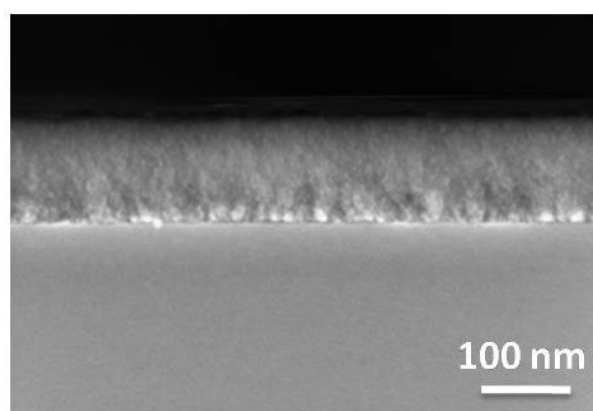

**Figure S8.** Left: Layer obtained from the CVD of **3c**. Right: Cross section image obtained from the CVD of **3c**, substrate temperature 450 °C, deposition time 1 h, working pressure 1 mbar, N<sub>2</sub> (50 mL min<sup>-1</sup>).



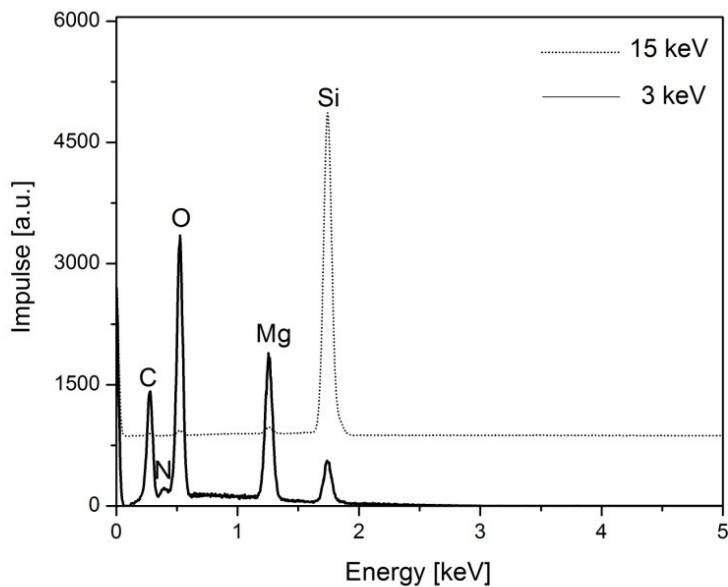

**Figure S9.** EDX spectra of the film obtained using **3a** as CVD precursor,  $N_2$  ( $50 \text{ mL min}^{-1}$ ), substrate temperature  $450 \text{ }^\circ\text{C}$ .

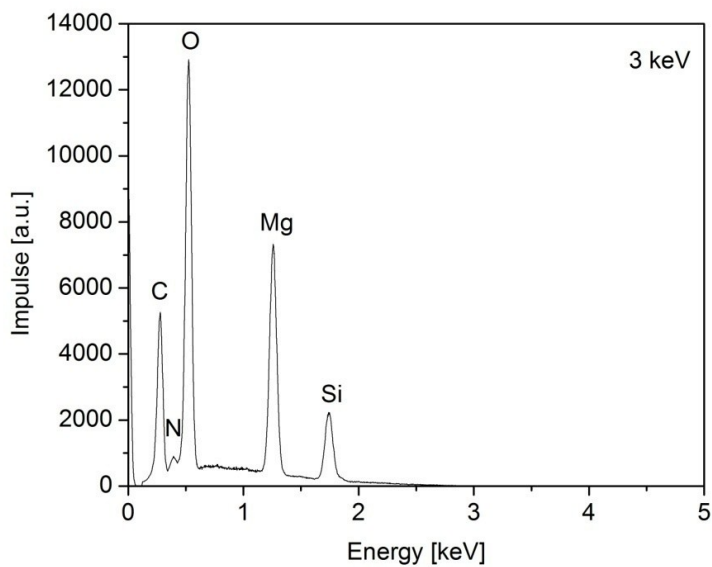

**Figure S10.** EDX spectra of the film obtained using **3c** as CVD precursor,  $N_2$  ( $50 \text{ mL min}^{-1}$ ), substrate temperature  $450 \text{ }^\circ\text{C}$ .

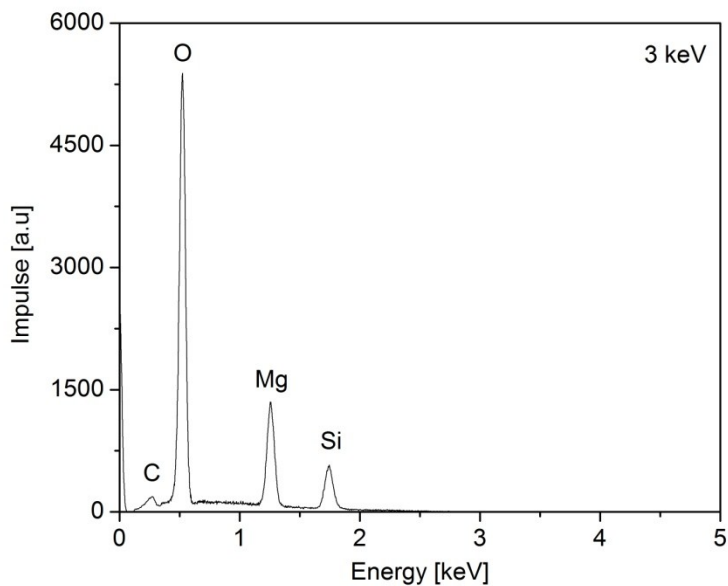

**Figure S11.** EDX spectra of the film obtained using **3c** as CVD precursor,  $N_2$  (50 mL min<sup>-1</sup>),  $O_2$  (40 mL min<sup>-1</sup>), substrate temperature 450 °C.

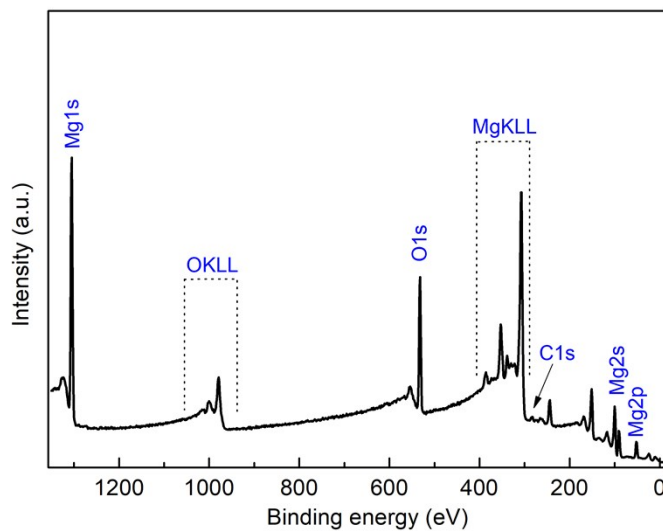

**Figure S12.** XPS spectra of the MgO film obtained using **3a** as CVD precursor,  $N_2$  (50 mL min<sup>-1</sup>),  $O_2$  (40 mL min<sup>-1</sup>), substrate temperature 450 °C, after 2 min sputtering ( $Ar^+$ , 4.0 keV).



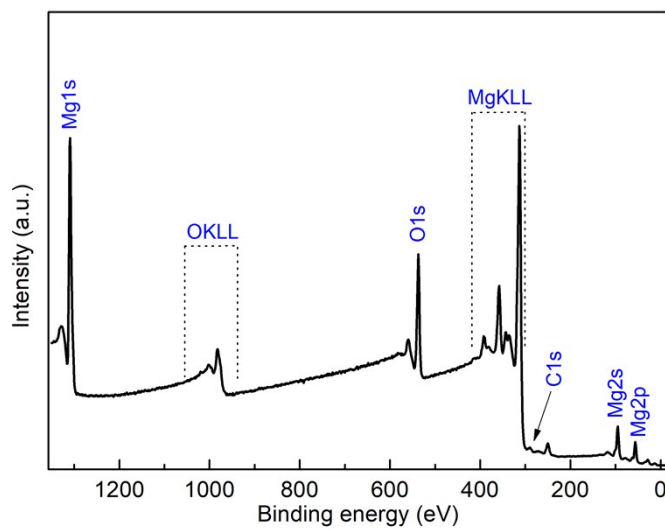

**Figure S13.** XPS spectra of the MgO film obtained using **3c** as CVD precursor, N<sub>2</sub> (50 mL min<sup>-1</sup>), substrate temperature 450 °C, after 2 min sputtering (Ar<sup>+</sup>, 4.0 keV).

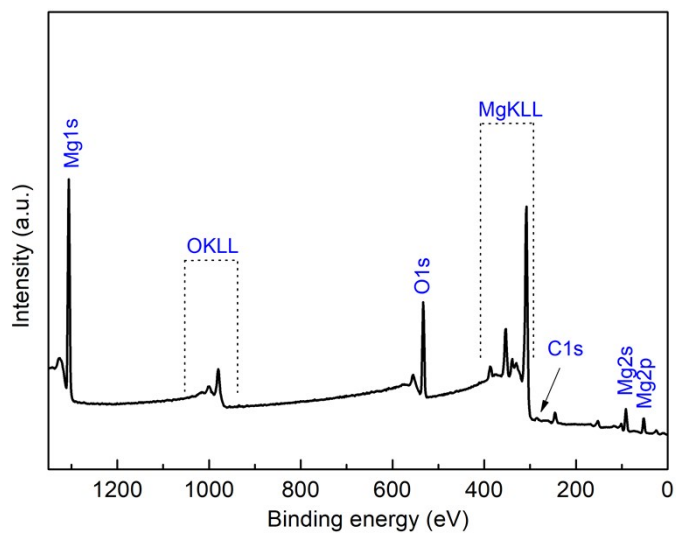

**Figure S14.** XPS spectra of the MgO film obtained using **3c** as CVD precursor, N<sub>2</sub> (50 mL min<sup>-1</sup>), O<sub>2</sub> (40 mL min<sup>-1</sup>), substrate temperature 450 °C, after 2 min sputtering (Ar<sup>+</sup>, 4.0 keV).

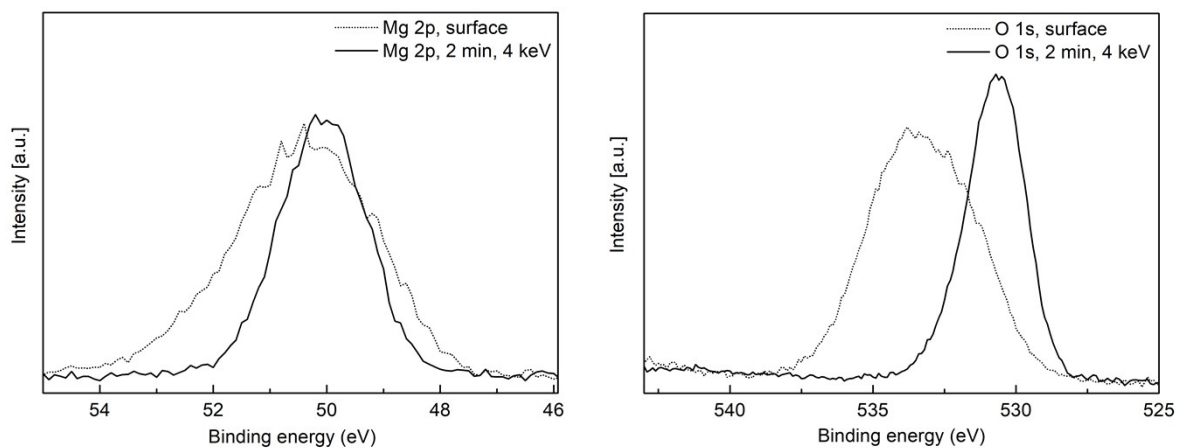

**Figure S15.** Detailed XPS spectra of the surface and layer composition of the film obtained from **3a** as CVD precursor,  $N_2$  ( $50 \text{ mL min}^{-1}$ ),  $O_2$  ( $40 \text{ mL min}^{-1}$ ), substrate temperature  $450 \text{ }^\circ\text{C}$ , after 2 min sputtering ( $Ar^+$ , 4.0 keV).

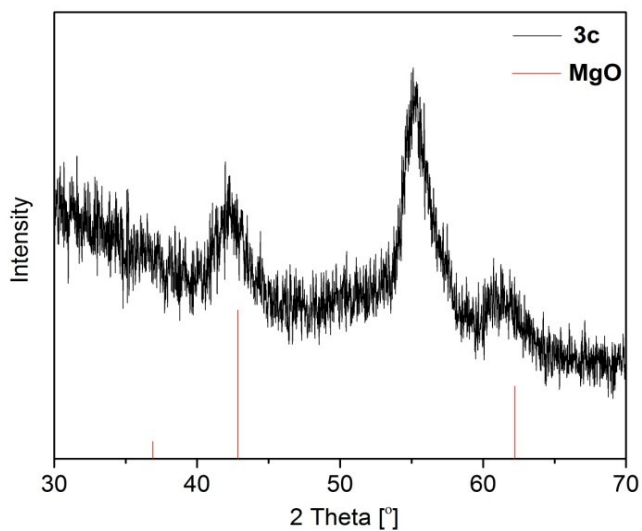

**Figure S16.** PXRD pattern of the layer obtained using **3c** as CVD precursor,  $N_2$  ( $50 \text{ mL min}^{-1}$ ), deposition time 1 h, working pressure 1 mbar, substrate temperature  $450 \text{ }^\circ\text{C}$ .
